# Supplementary material
Source: publisher site journal article supplement (https://www.dovepress.com/article/572978)
Supplement: Supplementary file 1 [file 572978_suppl%20file%20%252528Simplified%20guide%252529%20v1.0.docx]

**A Simple Guide to Analysing PROMs Data in Wales.**

**Michal Pruski, Rob Palmer, Kathleen Withers, Tim Pickles**

Introduction

This simple guide is designed to help those in Wales who need to analyse patient reported outcome (PRO) data on an aggregate level (i.e. from more than a single response), e.g. from patient reported outcome measure (PROM) tools, but are unfamiliar with how to start going about this. This guide presents you with the methodologically safest option on how to approach this analysis. It offers simple step-by-step instructions on how to analyse and present your data. If you require more in-depth information about analysing such data, it can be found in the accompanying article. More complex analysis is possible with expert knowledge. We provide some examples of commonly encountered PRO data at the end of this guide.

Understanding a PROM questionnaire

A PROM tool usually consists of a series of questions, although some only have one or two questions. When analysing the results, often several questions are grouped together into ‘scales’, ‘scores’, ‘domains’, ‘status’, ‘items’ or similar; although sometimes a domain might consist of only one question. There might also be an overall score.

Step 1: identify the type of data you have

There are different types of data that you might encounter when analysing PRO results. These are listed in Table 1.

| **Type** | **Descriptive statistics you can use** | **Definition and examples** |
| --- | --- | --- |
| **Nominal** | Mode, Variation Ratio | No obvious order e.g. yes/no or male/female questions |
| **Ordinal** | Mode, Median, Range, Interquartile range | There is order to the answers, but it is not clear how much difference there is between the options e.g. ‘Likert’ questions or with answer options like ‘none’, ‘a little’, ‘some’, ‘a lot’ and ‘all’, or respondents are classified as below or above a cut-off |
| **Interval** | Mode, Median, Arithmetic Mean, Range, Interquartile range, Standard deviation, Variance | Where you know how much difference there is between the different values, but the zero value does not represent the absence of something e.g. temperature given degrees Celsius is interval as the zero does not represent the absence of any heat, but the freezing point for water. |
| **Ratio** | Mode, Median, Arithmetic Mean, Geometric mean, Range, Interquartile range, Standard deviation, Variance, Relative standard deviation | Where you know how much difference there is between the different values and the zero value does represent the absence of something e.g. temperature given degrees Kelvin where zero represents the absence of any heat. |

Supplementary Table 1. Types of data, with the simplest type on the top and most complex on the bottom

Most PRO data will be ordinal, even if it is represented with numbers. For example, a questionnaire’s instructions might tell you to score answers like ‘none’, ‘a little’, ‘some’, ‘a lot’ and ‘all’ as 1, 2, 3, 4 and 5, but this does not mean that ‘a little’ is exactly two times as big as ‘none’. Even when the instructions from the questionnaire ask you to sum the results of individual questions of such a type to provide an overall score, this overall score **should still be treated as ordinal data**.

Some tools have been developed in such a way that the type of data they can collect may be something other than ordinal (such as Rasch measurement theory, Item Response Theory or composite time trade-off supplemented by discrete choice experiments, etc). If the questionnaire instructions or the paper discussing the development/validation of the questionnaire mentions this, then you may treat the data in a way that is appropriate to the method used. You do not necessarily need to understand how these methods work to be able to analyse your data, however it is essential to know what data type these methods produce to analyse data correctly. We will give some examples of questionnaires that incorporate these techniques.

It is worth to briefly commenting on visual analogue scales (VAS). There is some disagreement in the literature as to how VAS data should be treated. Theoretically VAS data is on interval or ratio scale, but there is some evidence that there is unequal spacing between values. As such, if in doubt, **treat VAS data, as ordinal data**. If you are confident that in a particular case it should be treated as a higher data type, do state your reasoning when presenting the analysis.

Step 2: Describe your results

You should explore your data and describe it using the appropriate type of measures of central tendency and variability. Table 1 describes which measures you can use for which type of data.

Step 3: Presenting the data

The best way to present ordinal data is to show the distribution of the scores, which is best done using a pie chart or bar graphs showing the frequency of responses. Avoid using single bars that only show the mean, as it is an incorrect measure of central tendency for ordinal data. Spider diagrams/radar plots can be misleading because the area denoted by the plotted line can be misleading if it is interpreted as being representative of the total score. **You should not be using the mean when describing ordinal data** and such bar graphs do not show the distribution of the data. If your data is interval or ratio, you can use scatter plot or a box plot. See figure 1.


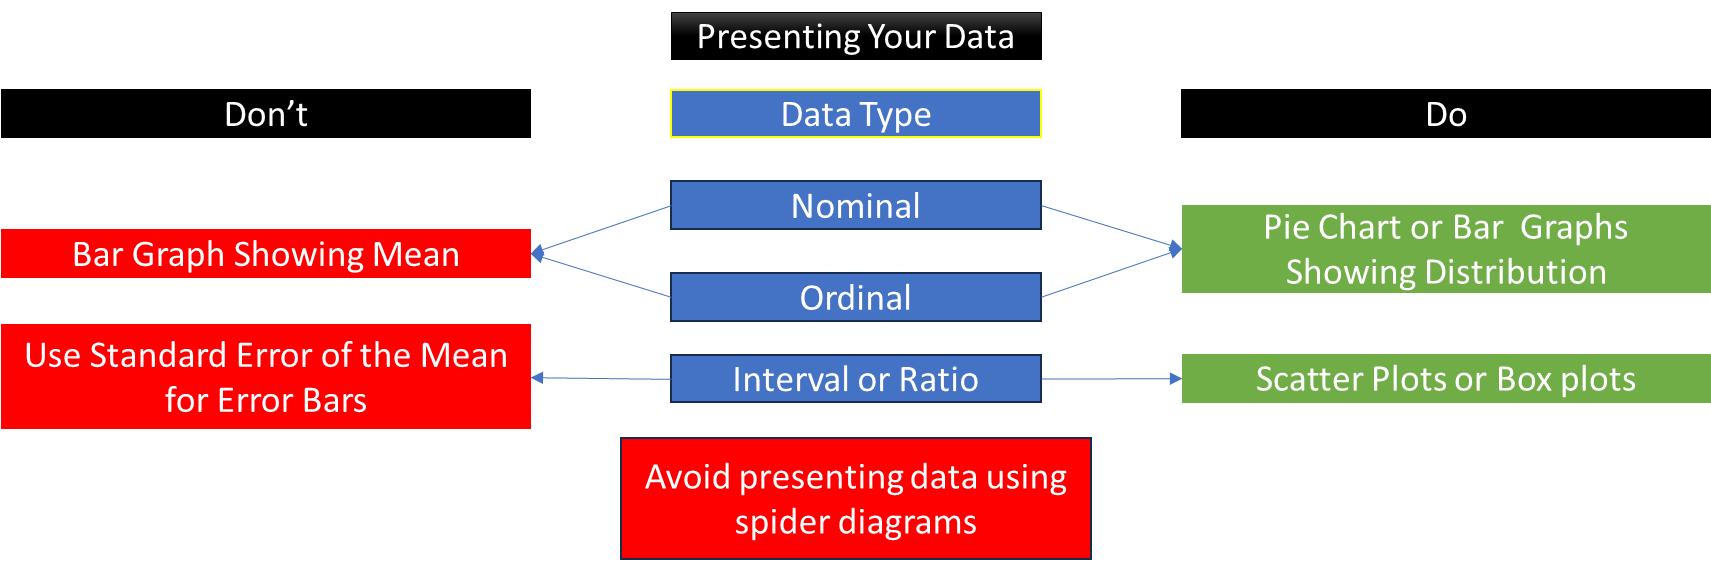


Supplementary Figure 1. Dos and don’ts for data presentation.

Step 4: Analysing the data

**Most PROMs data should be analysed as non-parametric data.** You can find a guide to selecting the appropriate statistical test here: <https://www.bmj.com/about-bmj/resources-readers/publications/statistics-square-one/13-study-design-and-choosing-statisti>

If the data is ratio, you might consider using parametric statistical tests. You might be able to use parametric statistics on interval data if there are many choice options available for that question. In either case you need to check that the data meets the assumptions of the test and that the distribution of the residuals after a parametric statistical test is normally distributed. You can find information on these in statistical textbooks and other academic resources. Remember you can always use a non-parametric test with parametric data, but **you cannot use a parametric test with non-parametric data** (i.e. don’t analyse ordinal data with a t-test or ANOVA). **Always make sure that your data meets the assumptions underlying the statistical test you are using.**

**Specific examples**

The purpose of this guide is to provide a unified approach to PROMs data analysis in Wales, and below we discuss how some of the most used PROMs in Welsh care pathways should be analysed. We also mention some PROMs that are utilised in a small volume of care pathways, but which we believe are illustrative of thorough design considerations.

*EQ-5D-5L*

The EuroQol 5-dimension 5-levels is used to measure health utility. The first part consists of five items, with these producing a status, which is translated into an index value that is region-specific. This index value has been established by using composite time trade-off supplemented by discrete choice experiments, and as such can be treated as ratio data. If scores for a single question are being analysed, then the data should be analysed as ordinal data.

The second part of the tool is a VAS which should be treated as ratio data if the residuals from a linear regression were shown to be normally distributed. If the residuals are not normally distributed, treat the EQ-5D VAS like all other VAS scales and assume that the data is ordinal.

*WPAI(-GH)*

Work Productivity and Activity Impairment PROM, consists of four domains, which are all calculated on an ratio scale. For individual items, respondents either input a numerical value representing the number of hours relating to the phenomenon the question is asking about or select a value on a 0-10 scale. The domain scores are calculated through a range of equations involving the individual scores. The ‘percent work time missed due to health’ domain can be treated as interval data since it only utilises hours in its calculation, while the other domains should be treated as of an ordinal type since they utilise a 0-10 scale in their calculation.

*PHQ-2*

The Patient Health Questionnaire-2 consists of two items, which give an overall score. Nevertheless, the score is checked against a cut-off value, and consequently it produces a binary result. Yet, because the there is an order to these binary values, the scale of the results is ordinal.

*PEM, EORTC QLQ-C30, ODI, KOOS, EPIC-26, KCCQ-12, OKS*

This paragraph relates to the Patient Evaluation Measure, European Organization for Research and Treatment of Cancer Quality of Life Questionnaire, Oswestry Disability Index, Knee Injury and Osteoarthritis Outcome Score, Expanded Prostate Cancer Index Composite-26, Kansas City Cardiomyopathy Questionnaire and the Oxford Knee Score. All these questionnaires consist of items measured on an ordinal scale, and their overall and domain scores are the sum of individual item scores. In some instances, these overall scores can be represented as percentages of the maximum score. None of these tools have been developed using Rasch measurement theory or similar techniques. As such, the scores calculated using these tools should be treated as ordinal data, even if it is presented as a percentage value. While in cases where there are missing responses some of these questionnaires’ scoring instructions might recommend using a mean of the other responses to fill in for the missing data, which might give the impression of the data not being ordinal. Nevertheless, whatever strategy is used to deal with missing data, the data still remain ordinal in nature.

*COMI*

The core outcome measure index consists of 7 items which together give an overall score. It pertains to neck and back problems, measuring pain as well as effects on carrying out day-to-day activities and general quality of life. Two of these items (pertaining to pain) are on an interval scale, while the remaining 5 are on an ordinal scale. Due to this mix of measurement scales, the overall score needs to be treated as the lowest level measurement used to obtain it. In this case, the overall score needs to be treated as ordinal data.

*VAS Back & Leg*

This questionnaire utilises a VAS to measure pain, using a 10 cm line, with 0 representing no pain and respondents can indicate any point along the line up to 10 cm. Responses are often measured in whole centimetres, creating a 0-10 scale. Nevertheless, as mentioned previously, this data is best treated as ordinal, unless you can be confident that is of a higher data type.

*Cat-PROM5*

This cataract PROM tool utilises five ordinal questions and was validated using Rasch measurement theory during its development. As such, when all five questions are answered, the PROM score can be analysed like if it was continuous variable on a ratio scale.

**PROM tool references**

Here are references to the PROM tools mentioned above. When possible, links to the tools themselves were, rather than to the academic papers describing these have been provided. These are provided only for information, and note that licenses might be required for implementation.

Cat-PROM5 - <https://static-content.springer.com/esm/art%3A10.1038%2Feye.2018.1/MediaObjects/41433_2018_BFeye20181_MOESM134_ESM.pdf>

COMI - <https://www.eurospine.org/fileadmin/Quality_Assurance/Resources/English/COMI_back_en.pdf>

EORTC QLQ-C30 - <https://www.eortc.org/app/uploads/sites/2/2018/08/Specimen-QLQ-C30-English.pdf>

EPIC-26 - <https://doi.org/10.1016/j.urology.2010.01.027>

EQ-5D-5L - <https://euroqol-domain.ams3.digitaloceanspaces.com/wp-content/uploads/2025/01/12124516/EQ-5D-5L-Userguide-2025-04.pdf>

KCCQ-12 - <https://doi.org/10.1161/CIRCOUTCOMES.115.001958> (the tool is available in the downloadable ‘supplementary material’)

KOOS - <https://www.worksafe.qld.gov.au/__data/assets/pdf_file/0022/24097/knee-injury-and-osteoarthritis-outcome-score-koos1.pdf>

ODI - <https://maic.qld.gov.au/wp-content/uploads/2016/02/Oswestry_Low_Back_Disability_Questionnaire.pdf>

OKS - <https://innovation.ox.ac.uk/wp-content/uploads/2014/09/FINAL_OKS_English_UK_SAMPLE-1.pdf>

PEM - <https://doi.org/10.1016/s0266-7681(95)80059-x>

PHQ-2 - <https://med.stanford.edu/content/dam/sm/ppc/documents/Mental_Health/PHQ-2_English.pdf>

VAS Back & Leg - <https://doi.org/10.1016/s0140-6736(74)90884-8>

WPAI(-GH) - <http://www.reillyassociates.net/wpai_gh.html>
